# Supplementary figures and images for: Robust motion estimation on a low-power multi-core DSP
Source: Springer Nature journal article supplement (doi:10.1186/1687-6180-2013-99), 2013-05-10

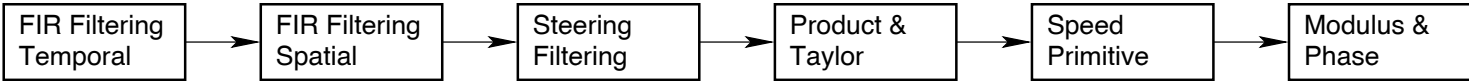

(I)

(II)

(III)

(IV)

(V)

(VI)

Supplement: 13634_2013_470_MOESM1_ESM.pdf [file 13634_2013_470_MOESM1_ESM.pdf]

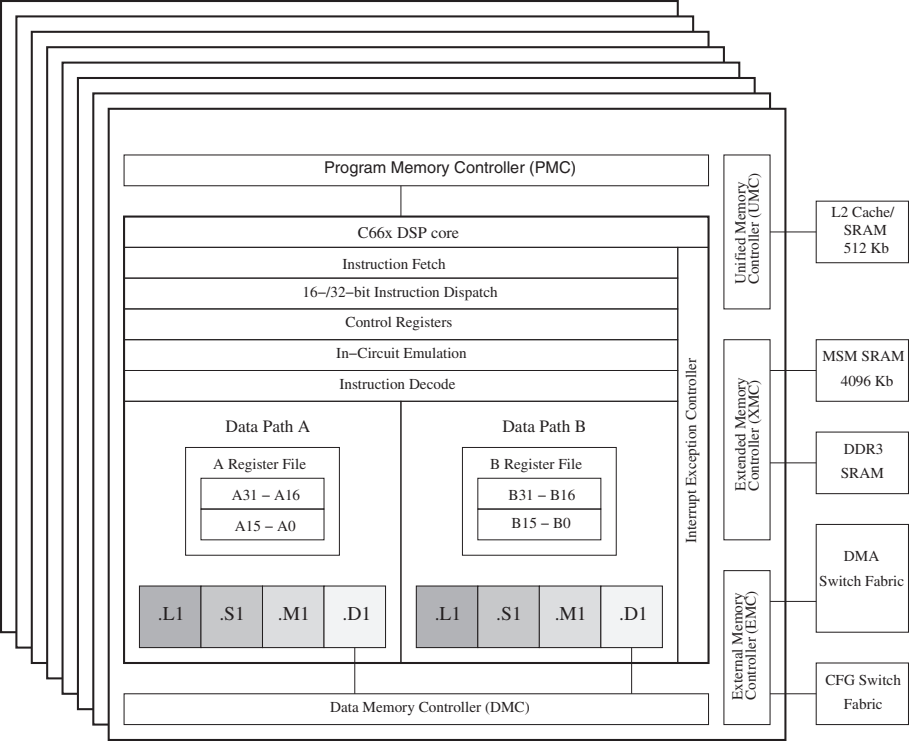

Supplement: 13634_2013_470_MOESM3_ESM.pdf [file 13634_2013_470_MOESM3_ESM.pdf]

## Stage 1. Temporal filtering

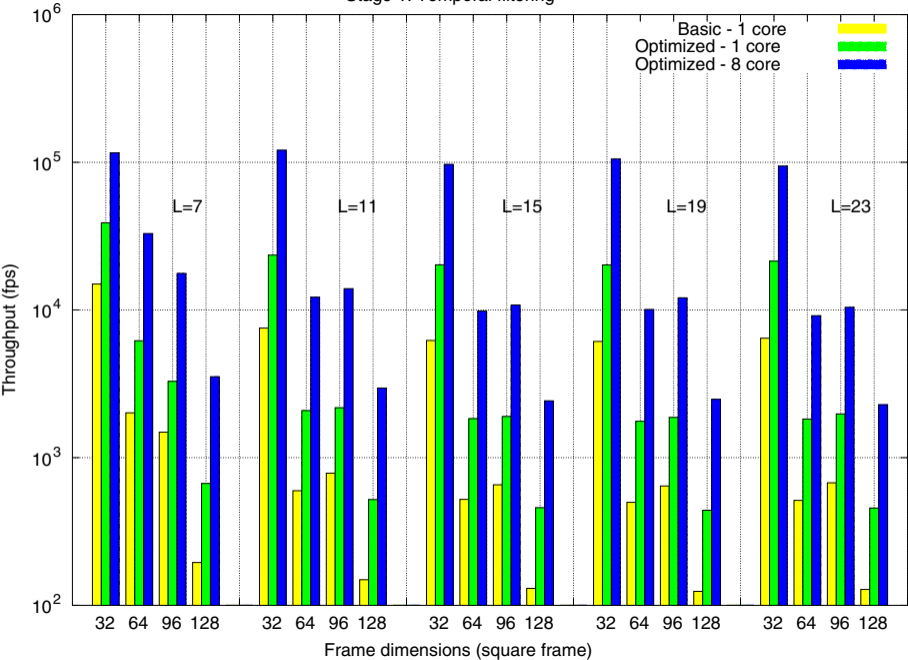

Supplement: 13634_2013_470_MOESM4_ESM.pdf [file 13634_2013_470_MOESM4_ESM.pdf]

## Stage 2. Spatial filtering

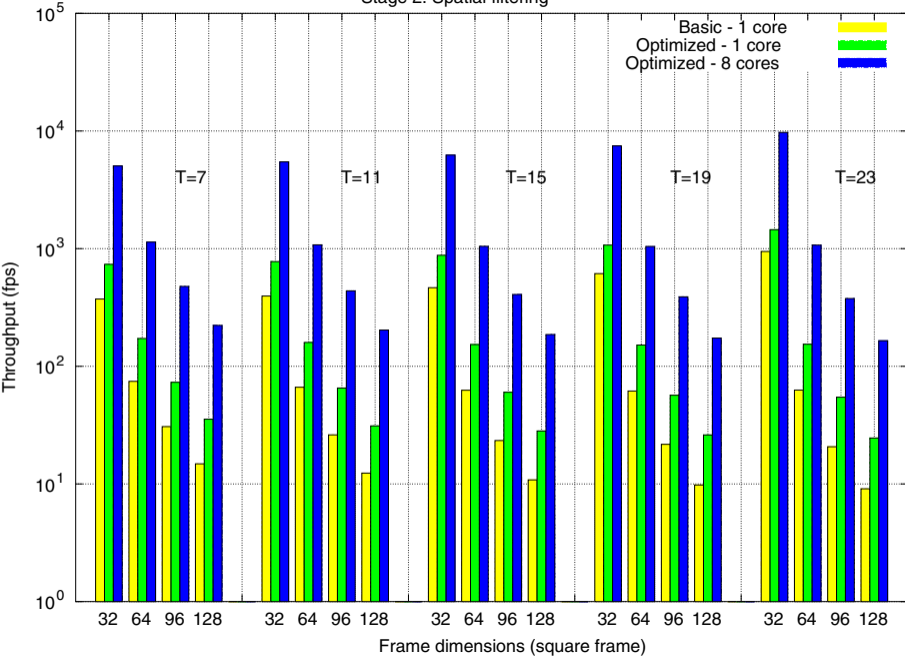

Supplement: 13634_2013_470_MOESM5_ESM.pdf [file 13634_2013_470_MOESM5_ESM.pdf]

## Stage 3. Steering

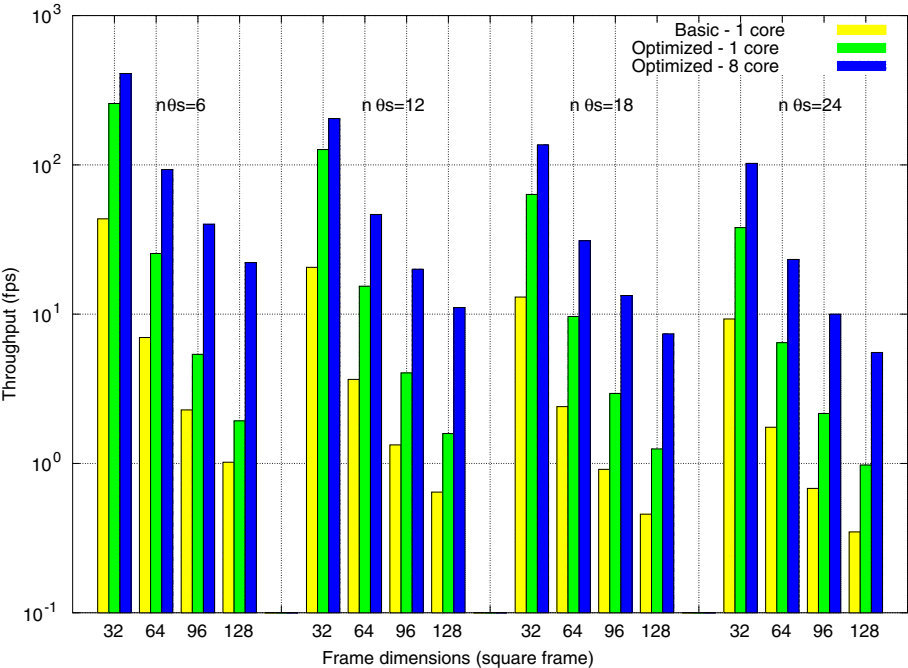

Supplement: 13634_2013_470_MOESM6_ESM.pdf [file 13634_2013_470_MOESM6_ESM.pdf]

Stage time decomposition for McGM

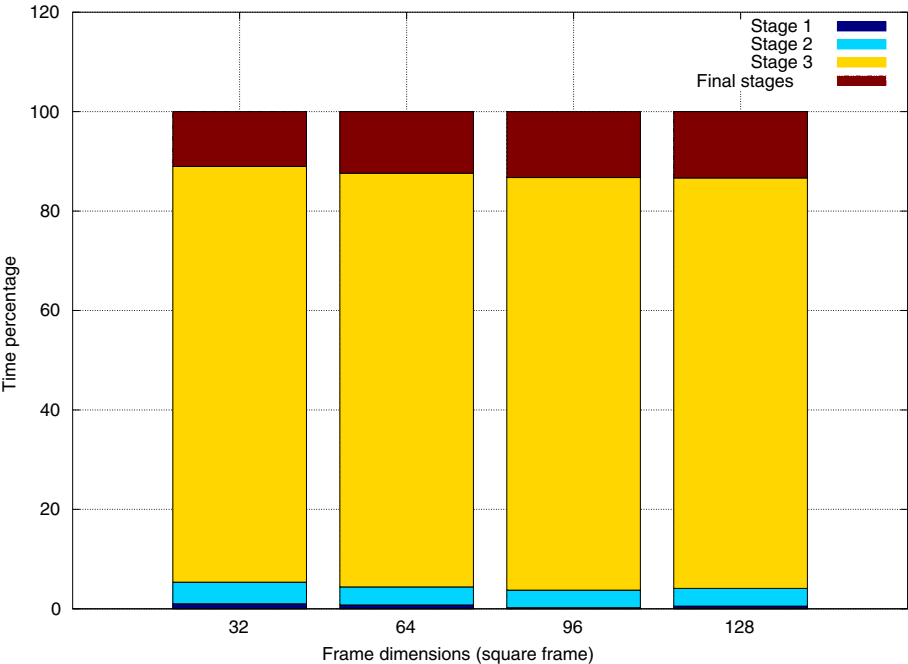

Supplement: 13634_2013_470_MOESM7_ESM.pdf [file 13634_2013_470_MOESM7_ESM.pdf]
